# Supplementary material
Source: publisher figshare collection journal article supplement (https://asha.figshare.com/articles/dataset/_/5116324)
Supplement: Supplementary file 1 [file 1]

**Supplemental Material S2.** Final *lmer* model for phoneme accuracy (logit transformed).

**PhonemeAccuracy(logit) ~ Feedback + Session + Native + (Feedback x Native) + (Feedback x Session) + (Session x Native) + (1 | Nonword) + (1 | Participant)**

| Random Effects          | Variance | SD     |
|-------------------------|----------|--------|
| Participant (Intercept) | 0.0397   | 0.1993 |
| NW (Intercept)          | 0.0095   | 0.0974 |
| Residual                | 0.3508   | 0.5923 |

  

| Fixed Effects           | Reference Group = 100% |       |       |       |     | Reference Group = 50% |       |       |       |     |
|-------------------------|------------------------|-------|-------|-------|-----|-----------------------|-------|-------|-------|-----|
|                         | Estimates              | SE    | t     | p     |     | Estimates             | SE    | t     | p     |     |
| (Intercept)             | 3.348                  | 0.090 | 37.06 | <.001 | *** | 3.356                 | 0.087 | 38.67 | <.001 | *** |
| Feedback 0              | -0.117                 | 0.107 | -1.10 | .279  |     | -0.126                | 0.104 | -1.21 | .234  |     |
| Feedback 20             | 0.063                  | 0.111 | 0.57  | .572  |     | 0.055                 | 0.108 | 0.51  | .615  |     |
| Feedback 50             | 0.008                  | 0.104 | 0.08  | .937  |     |                       |       |       |       |     |
| Feedback 100            |                        |       |       |       |     | -0.008                | 0.010 | -0.08 | .937  |     |
| Session (R1)            | 0.000                  | 0.037 | 0.00  | .998  |     | 0.033                 | 0.035 | 0.93  | .355  |     |
| Session (R2)            | 0.108                  | 0.037 | 2.91  | .004  | **  | 0.036                 | 0.035 | 1.03  | .304  |     |
| Native                  | -0.168                 | 0.076 | -2.20 | .057  | .   | -0.299                | 0.076 | -3.94 | .004  | **  |
| Feedback 0:Native       | 0.061                  | 0.038 | 1.59  | .112  |     | 0.192                 | 0.037 | 5.16  | <.001 | *** |
| Feedback 20:Native      | 0.010                  | 0.040 | 0.24  | .809  |     | 0.141                 | 0.039 | 3.65  | <.001 | *** |
| Feedback 50:Native      | -0.131                 | 0.037 | -3.53 | <.001 | *** |                       |       |       |       |     |
| Feedback 100:Native     |                        |       |       |       |     | 0.131                 | 0.037 | 33.53 | <.001 | *** |
| Feedback 0:Session R1   | 0.093                  | 0.047 | 1.97  | .047  | *   | 0.060                 | 0.046 | 1.31  | .190  |     |
| Feedback 20:Session R1  | 0.037                  | 0.049 | 0.77  | .444  |     | 0.004                 | 0.047 | 0.09  | .926  |     |
| Feedback 50:Session R1  | 0.033                  | 0.046 | 0.72  | .474  |     |                       |       |       |       |     |
| Feedback 100:Session R1 |                        |       |       |       |     | -0.033                | 0.046 | -0.72 | .474  |     |
| Feedback 0:Session R2   | 0.080                  | 0.047 | 1.71  | .087  | .   | 0.151                 | 0.046 | 3.32  | .001  | **  |
| Feedback 20:Session R2  | -0.053                 | 0.048 | -1.10 | .273  |     | 0.018                 | 0.047 | 0.38  | .702  |     |
| Feedback 50:Session R2  | -0.071                 | 0.046 | -1.56 | .119  |     |                       |       |       |       |     |
| Feedback 100:Session R2 |                        |       |       |       |     | 0.071                 | 0.046 | 1.56  | .119  |     |
| Session R1:Native       | 0.070                  | 0.033 | 2.12  | .034  | *   | 0.070                 | 0.033 | 2.12  | .034  | *   |
| Session R2:Native       | 0.108                  | 0.033 | 3.26  | .001  | **  | 0.108                 | 0.033 | 3.26  | .001  | **  |

**Supplemental Material S2.** (Continued.)

| <b>PhonemeAccuracy(logit) ~ Feedback + Session + Native + (Feedback x Native) + (Feedback x Session) + (Session x Native) + (1   Nonword) + (1   Participant)</b> |                             |       |       |       |     |                             |       |       |       |     |
|-------------------------------------------------------------------------------------------------------------------------------------------------------------------|-----------------------------|-------|-------|-------|-----|-----------------------------|-------|-------|-------|-----|
| <b>Fixed Effects</b>                                                                                                                                              | <b>Reference Group =20%</b> |       |       |       |     | <b>Reference Group = 0%</b> |       |       |       |     |
|                                                                                                                                                                   | Estimates                   | SE    | t     | p     |     | Estimates                   | SE    | t     | p     |     |
| (Intercept)                                                                                                                                                       | 3.410                       | 0.009 | 36.01 | <.001 | *** | 3.230                       | 0.093 | 35.76 | <.001 | *** |
| Feedback 0                                                                                                                                                        | −0.180                      | 0.110 | −1.63 | .112  |     |                             |       |       |       |     |
| Feedback 20                                                                                                                                                       |                             |       |       |       |     | 0.180                       | 0.110 | 1.632 | .112  |     |
| Feedback 50                                                                                                                                                       | −0.005                      | 0.108 | −0.51 | .615  |     | 0.126                       | 0.104 | 1.21  | .234  |     |
| Feedback 100                                                                                                                                                      | −0.063                      | 0.111 | −0.57 | .573  |     | 0.117                       | 0.107 | 1.10  | .279  |     |
| Session (R1)                                                                                                                                                      | 0.037                       | 0.039 | 0.95  | .342  |     | 0.093                       | 0.037 | 2.50  | .012  | *   |
| Session (R2)                                                                                                                                                      | 0.055                       | 0.039 | 1.40  | .163  |     | 0.188                       | 0.037 | 5.07  | <.001 | *** |
| Native                                                                                                                                                            | −0.016                      | 0.771 | −2.06 | .071  | .   | −0.107                      | 0.076 | −1.40 | .196  |     |
| Feedback 0:Native                                                                                                                                                 | 0.051                       | 0.040 | 1.29  | .196  |     |                             |       |       |       |     |
| Feedback 20:Native                                                                                                                                                |                             |       |       |       |     | −0.051                      | 0.040 | −1.29 | .196  |     |
| Feedback 50:Native                                                                                                                                                | −0.014                      | 0.039 | −3.65 | <.001 | *** | −0.192                      | 0.037 | −5.16 | <.001 | *** |
| Feedback 100:Native                                                                                                                                               | −0.010                      | 0.040 | −0.24 | .809  |     | −0.061                      | 0.038 | −1.59 | .112  |     |
| Feedback 0:Session R1                                                                                                                                             | 0.055                       | 0.049 | 1.14  | .253  |     |                             |       |       |       |     |
| Feedback 20:Session R1                                                                                                                                            |                             |       |       |       |     | −0.055                      | 0.049 | −1.14 | .253  |     |
| Feedback 50:Session R1                                                                                                                                            | −0.004                      | 0.027 | −0.09 | .926  |     | 0.060                       | 0.046 | −1.31 | .190  |     |
| Feedback 100:Session R1                                                                                                                                           | −0.037                      | 0.049 | −0.77 | .443  |     | −0.093                      | 0.047 | −1.97 | .048  | *   |
| Feedback 0:Session R2                                                                                                                                             | 0.133                       | 0.048 | 2.75  | .006  | **  |                             |       |       |       |     |
| Feedback 20:Session R2                                                                                                                                            |                             |       |       |       |     | −0.133                      | 0.048 | −2.75 | .006  | **  |
| Feedback 50:Session R2                                                                                                                                            | −0.018                      | 0.047 | −0.38 | .702  |     | −0.151                      | 0.046 | −3.32 | .001  | **  |
| Feedback 100:Session R2                                                                                                                                           | 0.053                       | 0.049 | 1.10  | .273  |     | −0.080                      | 0.047 | −1.71 | .087  | .   |
| Session R1:Native                                                                                                                                                 | 0.070                       | 0.033 | 2.12  | .034  | *   | 0.070                       | 0.033 | 2.12  | .034  | *   |
| Session R2:Native                                                                                                                                                 | 0.108                       | 0.033 | 3.26  | .001  | **  | 0.108                       | 0.033 | 3.26  | .001  | **  |
