# Supplementary material
Source: publisher figshare collection journal article supplement (https://asha.figshare.com/articles/dataset/_/5116324)
Supplement: Supplementary file 2 [file 1]

**Supplemental Material S8.** Mean phoneme accuracy by nativeness of the initial cluster and session. Standard deviations presented in parentheses.

|                  | <b>Phoneme accuracy</b><br>(percent phonemes correct) |                             |                            |
|------------------|-------------------------------------------------------|-----------------------------|----------------------------|
|                  | <b>Practice</b>                                       | <b>Short-term retention</b> | <b>Long-term retention</b> |
| <b>Native</b>    | 97.99 (5.4)                                           | 98.28 (4.8)                 | 98.70 (3.8)                |
| <b>Nonnative</b> | 96.41 (7.9)                                           | 97.46 (6.0)                 | 98.10 (5.5)                |
