# Supplementary material
Source: publisher figshare collection journal article supplement (https://asha.figshare.com/articles/dataset/_/5116324)
Supplement: Supplementary file 3 [file 1]

**Supplemental Material S13.** Mean performance (standard deviations in parentheses) by group on cognitive–linguistic tests. Peabody Picture Vocabulary Test (PPVT; Dunn & Dunn, 2007) standard scores provided. List length (average of last 2 correctly recalled) provided for forward and backward digit and block span tasks. Percent correct for whole nonwords, syllables, and phonemes provided for nonword repetition task. Diadochokinetic (DDK) rates are presented as number of syllables per second. No significant group differences found on these tasks (all  $ps > .05$ ).

| Group      | PPVT           | Digit span |           | Block span |           | Nonword repetition |                   |                  |
|------------|----------------|------------|-----------|------------|-----------|--------------------|-------------------|------------------|
|            | Standard score | Forward    | Backwards | Forward    | Backward  | Nonword accuracy   | Syllable accuracy | Phoneme accuracy |
| <b>0</b>   | 105 (9)        | 7.3 (1.4)  | 5.0 (1.9) | 5.6 (1.5)  | 6.3 (1.6) | 70.3 (11.5)        | 77.0 (6.0)        | 93.1 (3.8)       |
| <b>20</b>  | 105 (13)       | 6.8 (1.3)  | 6.2 (2.0) | 5.4 (1.0)  | 6.4 (1.1) | 63.4 (5.6)         | 73.0 (3.6)        | 89.9 (3.3)       |
| <b>50</b>  | 108 (12)       | 7.1 (1.4)  | 5.1 (1.4) | 5.5 (0.6)  | 5.7 (1.4) | 63.4 (16.6)        | 70.3 (7.7)        | 88.7 (5.2)       |
| <b>100</b> | 108 (12)       | 7.4 (1.3)  | 4.9 (0.7) | 5.3 (1.0)  | 5.4 (1.1) | 72.5 (11.0)        | 75.3 (7.6)        | 92.3 (3.9)       |

| Group      | DDK       |           |           |               |
|------------|-----------|-----------|-----------|---------------|
|            | /p^/ rate | /t^/ rate | /k^/ rate | /p^t^k^/ rate |
| <b>0</b>   | 6.0 (1.0) | 5.7 (0.9) | 5.1 (0.6) | 2.1 (0.2)     |
| <b>20</b>  | 5.5 (0.9) | 5.4 (0.9) | 4.9 (0.9) | 2.2 (0.3)     |
| <b>50</b>  | 6.0 (0.7) | 5.8 (1.0) | 5.5 (0.9) | 2.4 (0.2)     |
| <b>100</b> | 5.9 (0.4) | 6.1 (1.1) | 5.7 (0.8) | 2.3 (0.2)     |

## Reference

Dunn, L. M., & Dunn, D., M. (2007). *Peabody Picture Vocabulary Test–Fourth Edition*. Minneapolis, MN: Pearson Assessments.
