# Supplementary material
Source: publisher figshare collection journal article supplement (https://asha.figshare.com/articles/dataset/_/5116324)
Supplement: Supplementary file 4 [file 1]

**Supplemental Material S11.** Mean cluster duration for nonnative nonwords beginning with /f/ by feedback group and session. Standard deviations presented in parentheses.

| Feedback group | Cluster duration (in ms)<br>/f/- initial nonnative clusters |                      |                     |
|----------------|-------------------------------------------------------------|----------------------|---------------------|
|                | Practice                                                    | Short-term retention | Long-term retention |
| <b>0</b>       | 246 (31)                                                    | 245 (29)             | 233 (26)            |
| <b>20</b>      | 262 (51)                                                    | 274 (49)             | 251 (38)            |
| <b>50</b>      | 231 (40)                                                    | 241 (45)             | 226 (41)            |
| <b>100</b>     | 235 (43)                                                    | 230 (40)             | 228 (40)            |
| <b>Total</b>   | 243 (43)                                                    | 247 (44)             | 234 (38)            |
