# Supplementary material
Source: publisher figshare collection journal article supplement (https://asha.figshare.com/articles/dataset/_/5116324)
Supplement: Supplementary file 5 [file 1]

**Supplemental Material S6.** Final *lmer* model for cluster duration for nonnative nonwords beginning with /f/ (in milliseconds).

**/f/ClusterDuration ~ Feedback + Session + (1 | Nonword) + (1 | Participant)**

| <b>Random Effects</b>   | <b>Variance</b> | <b>SD</b> |  |  |  |  |  |  |  |  |
|-------------------------|-----------------|-----------|--|--|--|--|--|--|--|--|
| Participant (Intercept) | 1320            | 36.33     |  |  |  |  |  |  |  |  |
| NW (Intercept)          | 1087            | 32.96     |  |  |  |  |  |  |  |  |

  

| <b>Fixed Effects</b> | <b>Reference Group = 100%</b> |       |       |       |     | <b>Reference Group = 50%</b> |       |       |       |     |
|----------------------|-------------------------------|-------|-------|-------|-----|------------------------------|-------|-------|-------|-----|
|                      | Estimates                     | SE    | z     | p     |     | Estimates                    | SE    | z     | p     |     |
| (Intercept)          | 195.34                        | 15.09 | 12.95 | <.001 | *** | 200.59                       | 13.13 | 15.28 | <.001 | *** |
| Feedback 0           | 23.35                         | 20.52 | 1.14  | .266  |     | 18.11                        | 19.12 | 0.95  | .353  |     |
| Feedback 20          | 19.20                         | 20.47 | 0.93  | .358  |     | 13.95                        | 19.06 | 0.73  | .471  |     |
| Feedback 50          | 5.25                          | 19.87 | 0.26  | .794  |     |                              |       |       |       |     |
| Feedback 100         |                               |       |       |       |     | -5.25                        | 19.87 | -0.26 | .794  |     |
| Session (R1)         | 0.81                          | 2.70  | 0.30  | .764  |     | 0.81                         | 2.70  | 0.30  | .764  |     |
| Session (R2)         | -2.76                         | 2.66  | -1.04 | .299  |     | -2.76                        | 2.66  | -1.04 | .299  |     |

  

| <b>Fixed Effects</b> | <b>Reference Group = 20%</b> |       |       |       |     | <b>Reference Group = 0%</b> |       |       |       |     |
|----------------------|------------------------------|-------|-------|-------|-----|-----------------------------|-------|-------|-------|-----|
|                      | Estimates                    | SE    | z     | p     |     | Estimates                   | SE    | z     | p     |     |
| (Intercept)          | 214.54                       | 14.02 | 15.30 | <.001 | *** | 218.70                      | 14.10 | 15.51 | <.001 | *** |
| Feedback 0           | 4.15                         | 19.75 | 0.21  | .835  |     |                             |       |       |       |     |
| Feedback 20          |                              |       |       |       |     | -4.15                       | 19.75 | -0.21 | .835  |     |
| Feedback 50          | -13.95                       | 19.06 | -0.73 | .471  |     | -18.11                      | 19.12 | -0.95 | .353  |     |
| Feedback 100         | -19.20                       | 20.47 | -0.94 | .358  |     | -23.35                      | 20.52 | -1.14 | .266  |     |
| Session (R1)         | 0.81                         | 2.70  | 0.30  | .764  |     | 0.81                        | 2.70  | 0.30  | .764  |     |
| Session (R2)         | -2.76                        | 2.66  | -1.04 | .299  |     | -2.76                       | 2.66  | -1.04 | .299  |     |
