# Supplementary material
Source: publisher figshare collection journal article supplement (https://asha.figshare.com/articles/dataset/_/5116324)
Supplement: Supplementary file 6 [file 1]

**Supplemental Material S10.** Mean nonword duration by nativeness of the initial cluster and session. Standard deviations presented in parentheses.

|                  | <b>Nonword duration (in ms)</b> |                             |                            |
|------------------|---------------------------------|-----------------------------|----------------------------|
|                  | <b>Practice</b>                 | <b>Short-term retention</b> | <b>Long-term retention</b> |
| <b>Native</b>    | 1558 (130)                      | 1553 (128)                  | 1516 (120)                 |
| <b>Nonnative</b> | 1715 (133)                      | 1693 (133)                  | 1656 (139)                 |
