# Supplementary material
Source: publisher figshare collection journal article supplement (https://asha.figshare.com/articles/dataset/_/5116324)
Supplement: Supplementary file 7 [file 1]

**Supplemental Material S12.** Mean cluster duration for nonnative nonwords beginning with /f/ by feedback group and session. Standard deviations presented in parentheses.

| <b>Feedback group</b> | <b>Cluster duration (in ms)</b><br>/f/- initial nonnative clusters |                             |                            |
|-----------------------|--------------------------------------------------------------------|-----------------------------|----------------------------|
|                       | <b>Practice</b>                                                    | <b>Short-term retention</b> | <b>Long-term retention</b> |
| <b>0</b>              | 220 (38)                                                           | 226 (39)                    | 223 (36)                   |
| <b>20</b>             | 214 (37)                                                           | 219 (40)                    | 208 (34)                   |
| <b>50</b>             | 202 (50)                                                           | 197 (59)                    | 200 (55)                   |
| <b>100</b>            | 201 (63)                                                           | 184 (37)                    | 188 (36)                   |
| <b>Total</b>          | 209 (49)                                                           | 206 (48)                    | 204 (43)                   |
