# Supplementary material
Source: publisher figshare collection journal article supplement (https://asha.figshare.com/articles/dataset/_/5116324)
Supplement: Supplementary file 8 [file 1]

**Supplemental Material S3.** Final *lmer* model for nonword durations for nonwords with initial *native* clusters (in milliseconds).

**NativeNonwordDuration ~ Feedback + Session + (Feedback x Session) + (1 | Nonword) + (1 | Participant)**

| <b>Random Effects</b>   | Variance | SD    |
|-------------------------|----------|-------|
| Participant (Intercept) | 7509     | 86.66 |
| NW (Intercept)          | 504      | 22.46 |
| Residual                | 7006     | 83.70 |

  

| <b>Fixed Effects</b>    | <b>Reference Group = 100%</b> |       |       |       |     | <b>Reference Group = 50%</b> |       |        |       |     |
|-------------------------|-------------------------------|-------|-------|-------|-----|------------------------------|-------|--------|-------|-----|
|                         | Estimates                     | SE    | t     | p     |     | Estimates                    | SE    | t      | p     |     |
| (Intercept)             | 1505.46                       | 33.11 | 45.47 | <.001 | *** | 1594.34                      | 31.48 | 50.65  | <.001 | *** |
| Feedback 0              | 37.30                         | 44.08 | 0.85  | .404  |     | -51.58                       | 42.87 | -1.20  | .238  |     |
| Feedback 20             | 99.29                         | 45.57 | 2.18  | .036  | *   | 10.42                        | 44.39 | 0.24   | .816  |     |
| Feedback 50             | 88.88                         | 42.84 | 2.08  | .047  | *   |                              |       |        |       |     |
| Feedback 100            |                               |       |       |       |     | -88.88                       | 42.84 | -2.08  | .047  | *   |
| Session (R1)            | -4.57                         | 7.80  | -0.59 | .558  |     | -24.76                       | 7.57  | -3.27  | .001  | **  |
| Session (R2)            | -37.10                        | 7.63  | -4.86 | <.001 | *** | -84.57                       | 7.51  | -11.26 | <.001 | *** |
| Feedback 0:Session R1   | 25.26                         | 11.15 | 2.27  | .024  | *   | 45.45                        | 10.99 | 4.14   | <.001 | *** |
| Feedback 20:Session R1  | -12.07                        | 11.23 | -1.08 | .282  |     | 8.12                         | 11.06 | 0.73   | .463  |     |
| Feedback 50:Session R1  | -20.19                        | 10.87 | -1.86 | .063  | .   |                              |       |        |       |     |
| Feedback 100:Session R1 |                               |       |       |       |     | 20.19                        | 10.87 | 1.86   | .063  | .   |
| Feedback 0:Session R2   | 20.15                         | 10.91 | 1.85  | .065  | .   | 67.62                        | 10.83 | 6.25   | <.001 | *** |
| Feedback 20:Session R2  | 0.61                          | 11.03 | 0.06  | .956  |     | 48.08                        | 10.95 | 4.39   | <.001 | *** |
| Feedback 50:Session R2  | -47.47                        | 10.71 | -4.43 | <.001 | *** |                              |       |        |       |     |
| Feedback 100:Session R2 |                               |       |       |       |     | 47.47                        | 10.71 | 4.43   | <.001 | *** |

**Supplemental Material S3.** *(Continued.)*

**NativeNonwordDuration ~ Feedback + Session + (Feedback x Session) + (1 | Nonword) + (1 | Participant)**

| Fixed Effects           | Reference Group =20% |       |       |       |     | Reference Group = 0% |       |       |       |     |
|-------------------------|----------------------|-------|-------|-------|-----|----------------------|-------|-------|-------|-----|
|                         | Estimates            | SE    | t     | p     |     | Estimates            | SE    | t     | p     |     |
| (Intercept)             | 1604.76              | 35.10 | 45.72 | <.001 |     | 1542.76              | 33.15 | 46.54 | <.001 | *** |
| Feedback 0              | -61.99               | 45.59 | -1.36 | .184  |     |                      |       |       |       |     |
| Feedback 20             |                      |       |       |       |     | 62.00                | 45.59 | 1.36  | .184  |     |
| Feedback 50             | -10.42               | 44.39 | -0.24 | .816  |     | 51.58                | 42.87 | 1.20  | .238  |     |
| Feedback 100            | -99.29               | 45.57 | -2.18 | .038  | *   | -37.30               | 44.08 | -0.85 | .404  |     |
| Session (R1)            | -16.64               | 8.08  | -2.06 | .039  | *   | 20.69                | 7.96  | 2.60  | .009  | **  |
| Session (R2)            | -36.49               | 7.97  | -4.58 | <.001 | *** | -16.95               | 7.80  | -2.17 | .030  | *   |
| Feedback 0:Session R1   | 37.33                | 11.34 | 3.29  | .001  | **  |                      |       |       |       |     |
| Feedback 20:Session R1  |                      |       |       |       |     | -37.33               | 11.34 | -3.29 | .001  | **  |
| Feedback 50:Session R1  | -8.12                | 11.06 | -0.73 | .463  |     | -45.45               | 10.99 | -4.14 | <.001 | *** |
| Feedback 100:Session R1 | 12.07                | 11.23 | 1.08  | .282  |     | -25.26               | 11.15 | -2.27 | .024  | *   |
| Feedback 0:Session R2   | 19.54                | 11.15 | 1.75  | .080  | .   |                      |       |       |       |     |
| Feedback 20:Session R2  |                      |       |       |       |     | -19.54               | 11.15 | -1.75 | .080  | .   |
| Feedback 50:Session R2  | -48.08               | 10.95 | -4.39 | <.001 | *** | -67.62               | 10.83 | -6.25 | <.001 | *** |
| Feedback 100:Session R2 | -0.61                | 11.03 | -0.06 | .956  |     | -20.15               | 10.91 | -1.85 | .065  | .   |
