# Supplementary material
Source: publisher figshare collection journal article supplement (https://asha.figshare.com/articles/dataset/_/5116324)
Supplement: Supplementary file 9 [file 1]

**Supplemental Material S5.** Final *lmer* model for cluster duration for nonnative nonwords beginning with /f/ (in milliseconds).

**/f/ClusterDuration ~ Feedback + Session + (Feedback x Session) + (1 | Nonword) + (1 | Participant)**

| <b>Random Effects</b>   | Variance | SD    |
|-------------------------|----------|-------|
| Participant (Intercept) | 886      | 29.76 |
| Residual                | 856      | 29.25 |

  

| <b>Fixed Effects</b>    | <b>Reference Group = 100%</b> |       |       |       |     | <b>Reference Group = 50%</b> |       |       |       |     |
|-------------------------|-------------------------------|-------|-------|-------|-----|------------------------------|-------|-------|-------|-----|
|                         | Estimates                     | SE    | t     | p     |     | Estimates                    | SE    | t     | p     |     |
| (Intercept)             | 236.03                        | 10.92 | 21.62 | <.001 | *** | 234.89                       | 10.40 | 22.58 | <.001 | *** |
| Feedback 0              | 8.55                          | 15.47 | 0.55  | .585  |     | 9.69                         | 15.11 | 0.64  | .526  |     |
| Feedback 20             | 29.56                         | 16.62 | 1.78  | .086  | .   | 30.71                        | 16.29 | 1.89  | .069  | .   |
| Feedback 50             | -1.14                         | 15.08 | -0.08 | .940  |     |                              |       |       |       |     |
| Feedback 100            |                               |       |       |       |     | 1.14                         | 15.08 | 0.08  | .940  |     |
| Session (R1)            | -3.05                         | 3.94  | -0.78 | .439  |     | 10.24                        | 4.13  | 2.48  | .013  | *   |
| Session (R2)            | -5.05                         | 3.91  | -1.29 | .197  |     | -8.56                        | 4.07  | -2.10 | .036  | *   |
| Feedback 0:Session R1   | -1.16                         | 5.74  | -0.20 | .840  |     | -14.45                       | 5.87  | -2.46 | .014  | *   |
| Feedback 20:Session R1  | 11.27                         | 5.75  | 1.96  | .050  | .   | -2.02                        | 5.89  | -0.34 | .732  |     |
| Feedback 50:Session R1  | 13.29                         | 5.71  | 2.33  | .020  | *   |                              |       |       |       |     |
| Feedback 100:Session R1 |                               |       |       |       |     | -13.29                       | 5.71  | -2.33 | .020  | *   |
| Feedback 0:Session R2   | -8.92                         | 5.57  | -1.60 | .110  |     | -5.41                        | 5.69  | -0.95 | .343  |     |
| Feedback 20:Session R2  | -9.61                         | 5.77  | -1.67 | .096  | .   | -6.09                        | 5.88  | -1.04 | .300  |     |
| Feedback 50:Session R2  | -3.51                         | 5.65  | -0.62 | .534  |     |                              |       |       |       |     |
| Feedback 100:Session R2 |                               |       |       |       |     | 3.51                         | 5.65  | 0.62  | .534  |     |

**Supplemental Material S5. (Continued.)**

**/f/ClusterDuration ~ Feedback + Session + (Feedback x Session) + (1 | Nonword) + (1 | Participant)**

| Fixed Effects           | Reference Group = 20% |       |       |       |     | Reference Group = 0% |       |       |       |     |
|-------------------------|-----------------------|-------|-------|-------|-----|----------------------|-------|-------|-------|-----|
|                         | Estimates             | SE    | t     | p     |     | Estimates            | SE    | t     | p     |     |
| (Intercept)             | 265.60                | 12.53 | 21.19 | <.001 | *** | 244.58               | 10.96 | 22.33 | <.001 | *** |
| Feedback 0              | -21.02                | 16.65 | -1.26 | .217  |     |                      |       |       |       |     |
| Feedback 20             |                       |       |       |       |     | 21.02                | 16.65 | 1.26  | .217  |     |
| Feedback 50             | -30.71                | 16.29 | -1.89 | .069  | .   | -9.69                | 15.11 | -0.64 | .526  |     |
| Feedback 100            | -29.56                | 16.62 | -1.78 | .086  | .   | -8.55                | 15.47 | -0.55 | .585  |     |
| Session (R1)            | 8.22                  | 4.19  | 1.96  | .050  | .   | -4.21                | 4.17  | -1.01 | .313  |     |
| Session (R2)            | -14.65                | 4.24  | -3.46 | <.001 | *** | -13.97               | 3.97  | -3.52 | <.001 | *** |
| Feedback 0:Session R1   | -12.43                | 5.92  | -2.10 | .036  | *   |                      |       |       |       |     |
| Feedback 20:Session R1  |                       |       |       |       |     | 12.43                | 5.92  | 2.10  | .036  | *   |
| Feedback 50:Session R1  | 2.02                  | 5.89  | 0.34  | .732  |     | 14.45                | 5.87  | 2.46  | .014  | *   |
| Feedback 100:Session R1 | -11.27                | 5.75  | -1.96 | .050  | .   | 1.16                 | 5.74  | 0.20  | .840  |     |
| Feedback 0:Session R2   | 0.68                  | 5.81  | 0.12  | .907  |     |                      |       |       |       |     |
| Feedback 20:Session R2  |                       |       |       |       |     | -0.68                | 5.81  | -0.12 | .907  |     |
| Feedback 50:Session R2  | 6.09                  | 5.88  | 1.04  | .300  |     | 5.41                 | 5.69  | 0.95  | .342  |     |
| Feedback 100:Session R2 | 9.60                  | 5.77  | 1.66  | .096  | .   | 8.92                 | 5.57  | 1.60  | .110  |     |
