# Supplementary material
Source: publisher figshare collection journal article supplement (https://asha.figshare.com/articles/dataset/_/5116324)
Supplement: Supplementary file 10 [file 1]

**Supplemental Material S1.** Final *lmer* model for whole nonword accuracy.

**WholeNonwordAccuracy ~ Feedback + Session + Native + (1 | Nonword) + (1 | Participant)**

| Random Effects | Variance               | SD     |       |       |     |                       |       |       |       |     |
|----------------|------------------------|--------|-------|-------|-----|-----------------------|-------|-------|-------|-----|
| Participant    |                        |        |       |       |     |                       |       |       |       |     |
| (Intercept)    | 0.5780                 | 0.7602 |       |       |     |                       |       |       |       |     |
| NW (Intercept) | 0.1154                 | 0.3397 |       |       |     |                       |       |       |       |     |
|                |                        |        |       |       |     |                       |       |       |       |     |
|                | Reference Group = 100% |        |       |       |     | Reference Group = 50% |       |       |       |     |
| Fixed Effects  | Estimates              | SE     | z     | p     |     | Estimates             | SE    | z     | p     |     |
| (Intercept)    | 1.153                  | 0.327  | 3.53  | <.001 | *** | 0.858                 | 0.312 | 2.75  | .006  | **  |
| Feedback 0     | −0.127                 | 0.389  | −0.33 | .744  |     | 0.169                 | 0.377 | 0.45  | .654  |     |
| Feedback 20    | 0.090                  | 0.402  | 0.22  | .823  |     | 0.386                 | 0.391 | 0.99  | .324  |     |
| Feedback 50    | −0.296                 | 0.377  | −0.78 | .433  |     |                       |       |       |       |     |
| Feedback 100   |                        |        |       |       |     | 0.296                 | 0.377 | 0.78  | .433  |     |
| Session (R1)   | 0.325                  | 0.065  | 5.03  | <.001 | *** | 0.325                 | 0.065 | 5.03  | <.001 | *** |
| Session (R2)   | 0.620                  | 0.067  | 9.31  | <.001 | *** | 0.620                 | 0.067 | 9.31  | <.001 | *** |
| Native         | −0.737                 | 0.246  | −2.99 | .003  | **  | −0.737                | 0.246 | −2.99 | .003  | **  |
|                |                        |        |       |       |     |                       |       |       |       |     |
|                | Reference Group =20%   |        |       |       |     | Reference Group = 0%  |       |       |       |     |
| Fixed Effects  | Estimates              | SE     | z     | p     |     | Estimates             | SE    | z     | p     |     |
| (Intercept)    | 1.243                  | 0.343  | 3.63  | <.001 | *** | 1.026                 | 0.326 | 3.15  | .002  | **  |
| Feedback 0     | −0.217                 | 0.402  | −0.54 | .590  |     |                       |       |       |       |     |
| Feedback 20    |                        |        |       |       |     | 0.217                 | 0.402 | 0.539 | .590  |     |
| Feedback 50    | −0.386                 | 0.391  | −0.99 | .324  |     | −0.169                | 0.377 | −0.45 | .655  |     |
| Feedback 100   | −0.090                 | 0.402  | −0.22 | .823  |     | 0.127                 | 0.389 | 0.33  | .744  |     |
| Session (R1)   | 0.325                  | 0.065  | 5.03  | <.001 | *** | 0.325                 | 0.065 | 5.03  | <.001 | *** |
| Session (R2)   | 0.620                  | 0.067  | 9.31  | <.001 | *** | 0.620                 | 0.067 | 9.31  | <.001 | *** |
| Native         | −0.737                 | 0.246  | −2.99 | .003  | **  | −0.737                | 0.246 | −2.99 | .003  | **  |
