# Supplementary material
Source: publisher figshare collection journal article supplement (https://asha.figshare.com/articles/dataset/_/5116324)
Supplement: Supplementary file 11 [file 1]

**Supplemental Material S9.** Mean nonword duration by feedback group and session. Standard deviations presented in parentheses.

| <b>Feedback group</b> | <b>Nonword duration (in ms)</b><br>native + nonnative nonwords |                             |                            |
|-----------------------|----------------------------------------------------------------|-----------------------------|----------------------------|
|                       | <b>Practice</b>                                                | <b>Short-term retention</b> | <b>Long-term retention</b> |
| <b>0</b>              | 1617 (161)                                                     | 1623 (148)                  | 1590 (136)                 |
| <b>20</b>             | 1658 (127)                                                     | 1655 (136)                  | 1626 (122)                 |
| <b>50</b>             | 1649 (146)                                                     | 1624 (147)                  | 1584 (156)                 |
| <b>100</b>            | 1596 (156)                                                     | 1555 (141)                  | 1519 (147)                 |
| <b>Total</b>          | 1622 (152)                                                     | 1613 (148)                  | 1578 (146)                 |
