# Supplementary material
Source: publisher figshare collection journal article supplement (https://asha.figshare.com/articles/dataset/_/5116324)
Supplement: Supplementary file 12 [file 1]

**Supplemental Material S4.** Final *lmer* model for nonword durations for nonwords with initial *nonative* clusters (in milliseconds).

**NonnativeNonwordDuration ~ Feedback + Session + (Feedback x Session) + (1 | Nonword) + (1 | Participant)**

| Random Effects          | Variance | SD    |
|-------------------------|----------|-------|
| Participant (Intercept) | 8271     | 90.95 |
| NW (Intercept)          | 2837     | 53.26 |
| Residual                | 7574     | 87.03 |

  

| Fixed Effects           | Reference Group = 100% |       |       |       |     | Reference Group = 50% |       |        |       |     |
|-------------------------|------------------------|-------|-------|-------|-----|-----------------------|-------|--------|-------|-----|
|                         | Estimates              | SE    | t     | p     |     | Estimates             | SE    | t      | p     |     |
| (Intercept)             | 1664.50                | 42.29 | 39.35 | <.001 | *** | 1746.58               | 41.03 | 42.57  | <.001 | *** |
| Feedback 0              | 65.16                  | 46.59 | 1.40  | .172  |     | -16.91                | 45.44 | -0.37  | .712  |     |
| Feedback 20             | 99.33                  | 48.20 | 2.06  | .048  | *   | 17.25                 | 47.08 | 0.37   | .717  |     |
| Feedback 50             | 82.08                  | 45.31 | 1.81  | .080  | .   |                       |       |        |       |     |
| Feedback 100            |                        |       |       |       |     | -82.08                | 45.31 | -1.81  | .080  | .   |
| Session (R1)            | -27.34                 | 9.13  | -2.99 | .003  | **  | -31.34                | 9.70  | -3.23  | .001  | **  |
| Session (R2)            | -65.30                 | 8.95  | -7.30 | <.001 | *** | -103.15               | 9.42  | -10.95 | <.001 | *** |
| Feedback 0:Session R1   | 9.18                   | 13.50 | 0.68  | .497  |     | 13.18                 | 13.89 | 0.95   | .343  |     |
| Feedback 20:Session R1  | 16.76                  | 13.62 | 1.23  | .219  |     | 20.76                 | 14.02 | 1.48   | .139  |     |
| Feedback 50:Session R1  | -4.00                  | 13.32 | -0.30 | .764  |     |                       |       |        |       |     |
| Feedback 100:Session R1 |                        |       |       |       |     | 4.00                  | 13.32 | 0.30   | .763  |     |
| Feedback 0:Session R2   | 4.68                   | 13.05 | 0.36  | .720  |     | 42.52                 | 13.38 | 3.18   | .002  | **  |
| Feedback 20:Session R2  | 1.18                   | 13.42 | 0.09  | .930  |     | 39.03                 | 13.74 | 2.84   | .005  | **  |
| Feedback 50:Session R2  | -37.85                 | 12.99 | -2.91 | .004  | **  |                       |       |        |       |     |
| Feedback 100:Session R2 |                        |       |       |       |     | 37.85                 | 12.99 | 2.91   | .004  | **  |

**Supplemental Material S4.** *(Continued.)*

**NonnativeNonwordDuration ~ Feedback + Session + (Feedback x Session) + (1 | Nonword) + (1 | Participant)**

| Fixed Effects           | Reference Group = 20% |       |       |       |     | Reference Group = 0% |       |       |       |     |
|-------------------------|-----------------------|-------|-------|-------|-----|----------------------|-------|-------|-------|-----|
|                         | Estimates             | SE    | t     | p     |     | Estimates            | SE    | t     | p     |     |
| (Intercept)             | 1763.83               | 44.19 | 39.91 | <.001 | *** | 1729.66              | 42.43 | 40.76 | <.001 | *** |
| Feedback 0              | -34.17                | 48.32 | -0.71 | .485  |     |                      |       |       |       |     |
| Feedback 20             |                       |       |       |       |     | 34.17                | 48.32 | 0.71  | .485  |     |
| Feedback 50             | -17.25                | 47.08 | -0.37 | .717  |     | 16.93                | 45.44 | 0.37  | .712  |     |
| Feedback 100            | -99.33                | 48.20 | -2.06 | .048  | *   | -65.16               | 46.59 | -1.40 | .172  |     |
| Session (R1)            | -10.58                | 10.12 | -1.05 | .296  |     | -18.16               | 9.94  | -1.83 | .068  | .   |
| Session (R2)            | -64.12                | 10.00 | -6.41 | <.001 | *** | -60.62               | 9.51  | -6.38 | <.001 | *** |
| Feedback 0:Session R1   | -7.59                 | 14.18 | -0.54 | .593  |     |                      |       |       |       |     |
| Feedback 20:Session R1  |                       |       |       |       |     | 7.59                 | 14.18 | 0.54  | .593  |     |
| Feedback 50:Session R1  | -20.76                | 14.02 | -1.48 | .139  |     | -13.18               | 13.89 | -0.95 | .343  |     |
| Feedback 100:Session R1 | -16.76                | 13.62 | -1.23 | .219  |     | -9.18                | 13.50 | -0.68 | .497  |     |
| Feedback 0:Session R2   | 3.50                  | 13.80 | 0.25  | .800  |     |                      |       |       |       |     |
| Feedback 20:Session R2  |                       |       |       |       |     | -3.50                | 13.80 | -0.25 | .800  |     |
| Feedback 50:Session R2  | -39.03                | 13.74 | -2.84 | .005  | **  | -42.52               | 13.38 | -3.18 | .002  | **  |
| Feedback 100:Session R2 | -1.18                 | 13.42 | -0.09 | .930  |     | -4.68                | 13.05 | -0.36 | .720  |     |
