# Supplementary material
Source: publisher figshare collection journal article supplement (https://asha.figshare.com/articles/dataset/_/5116324)
Supplement: Supplementary file 13 [file 1]

**Supplemental Material S7.** Mean phoneme accuracy by feedback group and session. Standard deviations presented in parentheses.

| <b>Feedback group</b> | <b>Phoneme accuracy</b><br>(percent phonemes correct) |                             |                            |
|-----------------------|-------------------------------------------------------|-----------------------------|----------------------------|
|                       | <b>Practice</b>                                       | <b>Short-term retention</b> | <b>Long-term retention</b> |
| <b>0</b>              | 96.86 (6.8)                                           | 97.98 (4.7)                 | 98.72 (3.0)                |
| <b>20</b>             | 98.16 (3.9)                                           | 98.52 (4.3)                 | 98.87 (2.7)                |
| <b>50</b>             | 96.49 (9.0)                                           | 97.34 (7.4)                 | 97.61 (6.7)                |
| <b>100</b>            | 97.49 (5.7)                                           | 97.79 (4.9)                 | 98.57 (4.6)                |
| <b>Total</b>          | 97.2 (6.8)                                            | 97.9 (5.5)                  | 98.4 (4.7)                 |
